# Supplementary material for: Insight into the dispersion behavior of 1-butyl-3-methylimiazolium chloride confined in nanoscale pores of carbon materials
Source: Royal Society of Chemistry journal article supplement (doi:10.1039/c8ra03033b), 2018-01-01
Supplement: c8ra03033b1.pdf [file c8ra03033b1.pdf]

# **Insight into the Dispersion Behavior of 1-butyl-3-methylimidazolium chloride Confined in Nanoscale pores of Carbon Materials**

Shuxia Di, Yiqi Xu, Qunfeng Zhng, Xiaolong Xu, Yuanyuan Zhai, Bolin Wang,  
Haihua He, Qingtao Wang, Hao Xu, Yishu Jiang, Jia Zhao,\* XiaonianLi\*

Industrial Catalysis Institute, Laboratory Breeding Base of Green Chemistry-  
Synthesis Technology, Zhejiang University of Technology, Hangzhou 310014, China.

Tel. /fax: +86 57188320002.

E-mail addresses: [jiazhao@zjut.edu.cn](mailto:jiazhao@zjut.edu.cn) (J. Zhao), [xnli@zjut.edu.cn](mailto:xnli@zjut.edu.cn) (X. Li).

## **Supporting Information**

**Table S1** XPS atomic semi-quantitative of carbon materials and SILP materials after washed

| Sample                  | The semi-quantitative of surface element (%) |      |      |      |
|-------------------------|----------------------------------------------|------|------|------|
|                         | C                                            | O    | N    | Cl   |
| AC-n                    | 90.58                                        | 8.07 | 1.31 | 0.04 |
| AC-n-N500               | 90.76                                        | 7.97 | 1.23 | 0.04 |
| AC-n-N900               | 92.08                                        | 6.30 | 1.58 | 0.05 |
| AC-n-10%IL(washed)      | 90.53                                        | 7.97 | 1.37 | 0.11 |
| AC-n-N500-10%IL(washed) | 91.06                                        | 7.41 | 1.41 | 0.12 |
| AC-n-N900-10%IL(washed) | 92.02                                        | 6.10 | 1.72 | 0.16 |

These semi-quantitative of C, O, N, Cl are listed in Table 1. It can be seen that the amount of oxygen atomic on the surface of AC-n decreased by thermal treatment temperature, which was consistent with the results of TPD measurement. Further, the amount of chlorine atomic on these three washed SILP materials was: 0.11%、0.12%、0.16%. This tendency was consistent with weighing method.

**Table S2** Amount (A) and Decomposing Temperatures (T) of Different surface oxygenated groups and the Total Amount of surface oxygenated groups (Obtained by the Deconvolution of CO<sub>2</sub>-TPD Curves)

| Sample    | carboxyl |     | carboxylic anhydride |     | peroxide |     | lactone1 |     | lactone2 |     | Total A |
|-----------|----------|-----|----------------------|-----|----------|-----|----------|-----|----------|-----|---------|
|           | A        | T   | A                    | T   | A        | T   | A        | T   | A        | T   |         |
| AC-n      | 81       | 273 | 200.6                | 410 | 2.91     | 615 | 11.93    | 687 | 5.24     | 817 | 301.3   |
| AC-n-N500 | 29.95    | 310 | 26.2                 | 490 | 1.35     | 538 | 31.45    | 617 | 14.25    | 780 | 103.2   |
| AC-n-N900 | /        | /   | /                    | /   | /        | /   | /        | /   | /        | /   | /       |

<sup>a</sup>The amount of surface oxygenated groups with the unit of  $\mu\text{mol/g}$ ;

<sup>b</sup>The decomposing temperature with the unit of  $^{\circ}\text{C}$ ; (It is similarly hereinafter if there is no additional description.)

<sup>c</sup>There is no such surface oxygenated group present on activated carbon according to the result of deconvolution.

**Table S3** Amount (A) and Decomposing Temperatures (T) of Different oxygenated groups and the Total Amount of oxygenated groups (Obtained by the Deconvolution of CO-TPD Curves)

| Sample    | Adsorptive CO |       | Carboxylic anhydride |        | phenol |        | ether |       | carbonyl |        | Total A |
|-----------|---------------|-------|----------------------|--------|--------|--------|-------|-------|----------|--------|---------|
|           | A             | T     | A                    | T      | A      | T      | A     | T     | A        | T      |         |
|           | AC-n          | 12.79 | 281                  | 125.72 | 517    | 191.79 | 675   | 63.82 | 745      | 199.18 |         |
| AC-n-N500 | /             | /     | 47.1                 | 541    | 173.3  | 657    | 118.9 | 726   | 347.2    | 840    | 686.5   |
| AC-n-N900 | /             | /     | /                    | /      | 89.3   | 652    | 31.2  | 769   | 34.7     | 875    | 155.2   |

<sup>a</sup>There is no such surface oxygenated group present on activated carbon according to the result of deconvolution.

The amount and decomposing temperature of different surface oxygenated groups and the total amount of surface oxygenated groups, obtained by the deconvolution of CO<sub>2</sub> and CO TPD curves, were summarized in **Table S2** and **Table S3**.

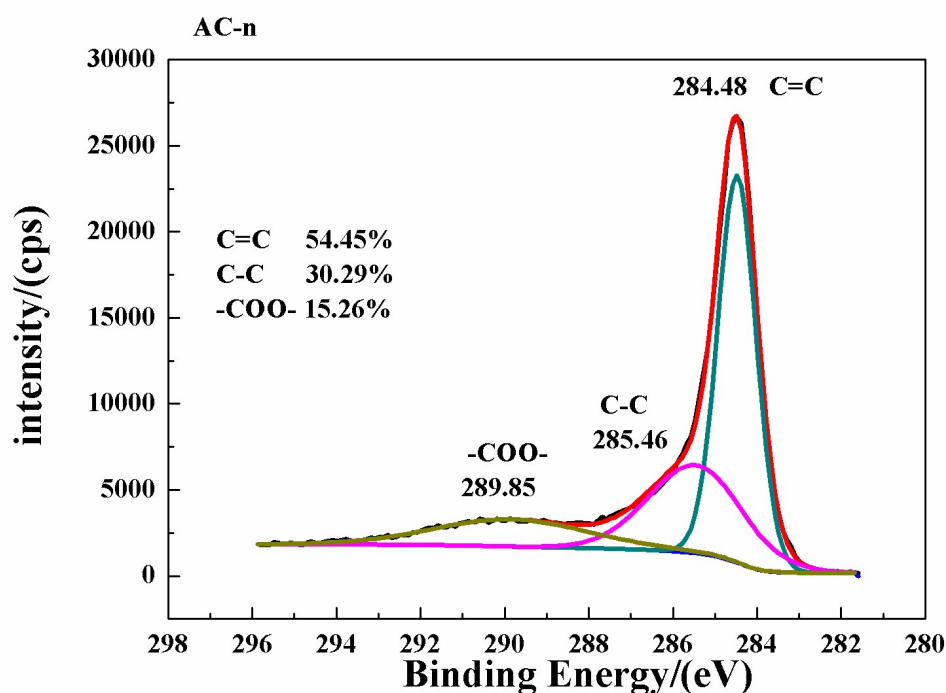

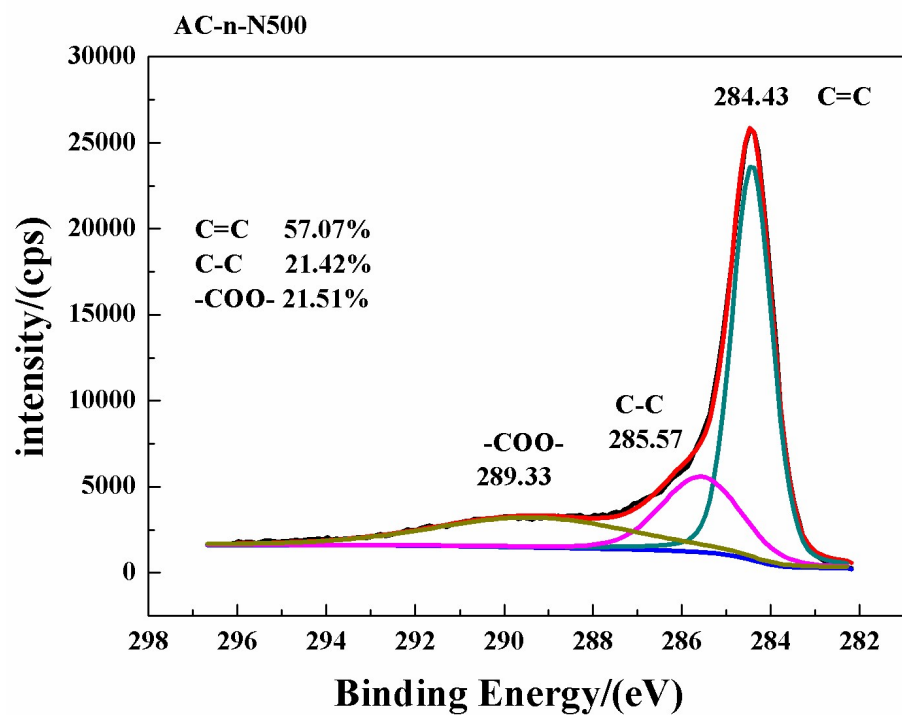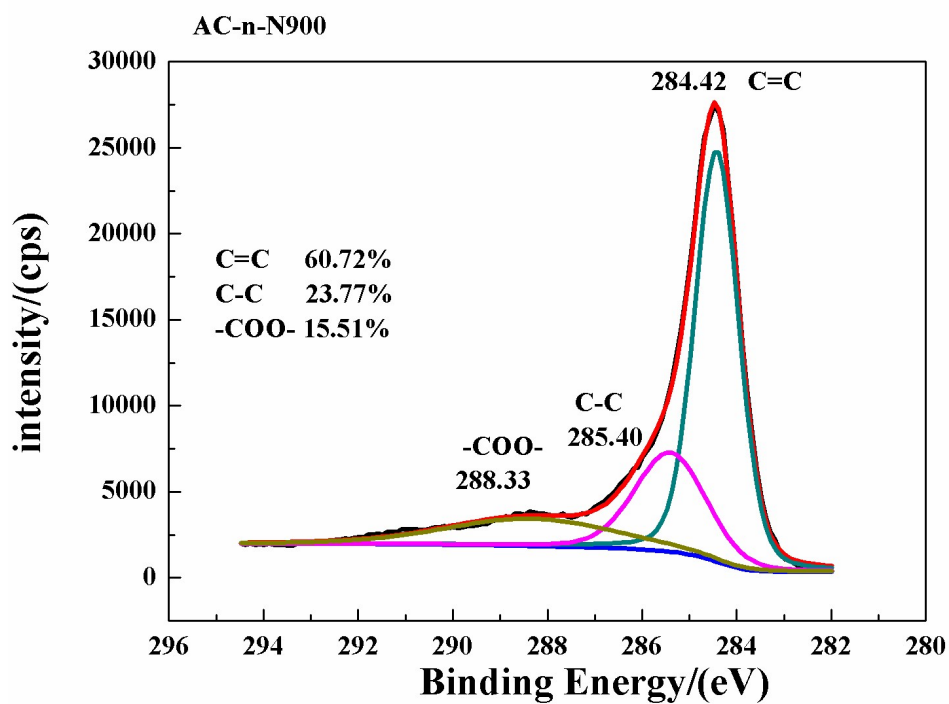

**Figure S1** High resolution XPS spectra of C1s peak for AC-n, AC-n-N500, AC-n-N900
